# Supplementary material for: Photothermal antenna effects derived from the one-to-one coupling nanohybrids of Au plasmonics and MoS2 semiconductors
Source: Royal Society of Chemistry journal article supplement (doi:10.1039/d0tc04990e), 2020-12-10
Supplement: d0tc04990e1.pdf [file d0tc04990e1.pdf]

*Supplementary Information*

**Photothermal antenna effects derived from one-to-one coupling nanohybrids of Au plasmonics and MoS<sub>2</sub> semiconductors**

Hao Lin Zou, Xiao Juan Du, Hong Qun Luo, Nian Bing Li,\* Bang Lin Li\*

Key Laboratory of Luminescence Analysis and Molecular Sensing (Southwest University), Ministry of Education, School of Chemistry and Chemical Engineering, Southwest University, Chongqing 400715, P. R. China.

Email: [chemlibl@swu.edu.cn](mailto:chemlibl@swu.edu.cn) (Li B. L.); [linb@swu.edu.cn](mailto:linb@swu.edu.cn) (Li N. B.)

**Materials.** Molybdenum disulfide (MoS<sub>2</sub> crystalline powder, < 2 μm, 99%) was obtained from Sigma-Aldrich Co. (USA). Sodium cholate (98%), chloroauric acid hydrated (HAuCl<sub>4</sub>·4H<sub>2</sub>O) were obtained from Aladdin Chemistry Co. Ltd. (Shanghai, China). All oligonucleotide sequences were ordered from Shanghai Sangon Biotech. Co. (Shanghai, China). Bovine serum albumin (BSA) and adenosine 5'-triphosphate (ATP) were purchased from BBI Life Science (Shanghai, China). Other chemicals were of analytical reagent grade and used without further purification. Ultrapure water (18.2 MΩ cm) was utilized throughout the whole experiment.

**Experimental instrumentations.** A KQ-400B ultrasonic bath (400 W, Kunshan Ultrasonic Instruments Co., Ltd., China) was adopted for the liquid-phase exfoliation of MoS<sub>2</sub> crystals. The optical absorption spectra were recorded on a UV-2450 UV-vis spectrophotometer (Shimadzu, Japan). X-ray photoelectron spectra (XPS) results were analyzed using an ESCALAB 250Xi X-ray photoelectron spectroscope (Thermo Electron, USA). Centrifugation treatments were conducted using a TGL-16M high-

speed refrigerated centrifuge (Xiangyi, China). Morphological characterization of nanostructures and energy dispersive X-ray spectroscopy (EDS) element mapping were conducted using a TecnaiG2 T20 UTWIN (FEI, USA) transmission electron microscope (TEM). Fluorescence measurements were conducted on F-7100 fluorescence spectrometer (Hitachi, Japan). Inductively coupled plasma-atomic emission spectra (ICP-AES) were employed for the quantitative analysis of Mo species concentrations (Agilent 7800ce, USA).

**Liquid-exfoliated strategies.** Briefly, a portion of 100.0 mL mixed aqueous dispersion, containing 5.0 mg/mL MoS<sub>2</sub> powders and 1.5 mg/mL sodium cholate, was treated with sonication (25 °C, 20 h). The resultant dispersion was centrifuged (3000 rpm, 30 min) and yellow-green supernatant was collected to remove un-exfoliated bulk crystals. In order to achieve size fractionation, the separated supernatant was centrifuged at 10000 rpm for further 30 min, and subsequently, the sediments of liquid-phase exfoliated MoS<sub>2</sub> samples (LE-MoS<sub>2</sub>) and the supernatant were isolated.

**Reactions between the LE-MoS<sub>2</sub> and chloroauric acid.** Firstly, a portion of 9.0 mL chloroauric acid (0.5 mM) solution was pre-heated in a water bath (70 °C) and kept stirred (300 rpm) for 30 min. Subsequently, a portion of the MoS<sub>2</sub> or BSA/MoS<sub>2</sub> mixing aqueous dispersion (1.0 mL, BSA: 2 mg/mL; MoS<sub>2</sub>: 200 µg/mL) was rapidly added to the treated chloroauric acid solution, whereas the reaction occurred immediately and terminated after 30 min. The resultant solution was taken out from the water bath for naturally cooling. As-obtained colorful dispersions were treated with centrifugation (10 000 rpm, 20 min), and sediments were further re-dispersed in a certain volume of ultrapure water for collecting the purified hybrids. Lastly, the products of BSA-covered Au/MoS<sub>2</sub> nanoarchitectures stocking solutions were stored at 4 °C for further experiments.

**The calculation of Au and MoS<sub>2</sub> composition in hybrids.** The products of Au/MoS<sub>2</sub> nanostructures were collected for ICP-AES detections. The ratios of MoS<sub>2</sub> were calculated through the concentrations of Mo species.

**Preparation of gold nanoparticles.** Gold nanoparticles (AuNPs) were prepared based on the well-known Frens method. Herein, citrate molecules were used as both reductants and stabilizers. Briefly, aqueous solutions of 50 mL of 0.5 mM HAuCl<sub>4</sub> were heated to 95 °C with vigorous magnetic stirring. Subsequently, the 1% (w/v) sodium citrate aqueous solutions (1.50 mL) were added all at once to generate AuNPs with average diameters of 21 nm. The yellow solutions of HAuCl<sub>4</sub> turned clear, dark blue and finally red, indicating the formation of AuNPs. After reaction for 15 min, the heated process was terminated and the resulting solutions were naturally cooled to room temperature. The final production was stored at 4 °C for further experiments.

**Preparation of BSA-covered MoS<sub>2</sub> and AuNPs.** The aqueous dispersions of nanomaterials (LE-MoS<sub>2</sub> and AuNPs) were incubated with 2 mg/mL BSA for 2 hours. Subsequently, the samples were centrifuged at 10000 rpm for 20 min, and the sediments were collected. The sediments were then re-dispersed into the ultrapure water under the treatment of sonication for the preparation of BSA-MoS<sub>2</sub> and BSA-AuNPs aqueous dispersions.

**IR treatments and fluorescence measurements.** The DNA-cy3 was added in OtO-Au/MoS<sub>2</sub> dispersion, and the fluorescence intensities ( $F_0$ ) were detected at the excitation wavelength of 550 nm. Subsequently, the mixture was treatment with IR (808 nm, 1.0 W/cm<sup>2</sup>) for 10 min, and the temperature of solution was increased. After the solution was naturally cooled to room temperature, the fluorescence ( $F$ ) was re-measured. The quenching ratio is estimated via an equation:  $(F_0-F)/F_0$ . In order to calculate sensing performance of the quenching system, ATP is added in the mixture solution and the incubation was conducted for 30 min. After that, the fluorescence of

system in the presence of ATP was detected.

**Table S1.** The DNA name corresponding to the sequence in the content.

| Name            | Sequence                                   |
|-----------------|--------------------------------------------|
| Poly(T)-Cy3     | 5'-TTTTT TTTTT TTTTT TTTTT-3' -Cy3         |
| Poly(A) -Cy3    | 5'-AAAAA AAAAA AAAAA AAAAA-3' -Cy3         |
| Poly(C) -Cy3    | 5'-CCCCC CCCCC CCCCC CCCCC-3' -Cy3         |
| Poly(G) -Cy3    | 5'-GGGGG GGGGG GGGGG GGGGG-3' -Cy3         |
| ATP Aptamer-Cy3 | 5'-ACCTG GGGGA GTATT GCGGA GGAAG GT-3'-Cy3 |
| cDNA            | 5'-ACCTT CCTCC GCAAT ACTCC CCCAG GT-3'     |

**Figure S1.**

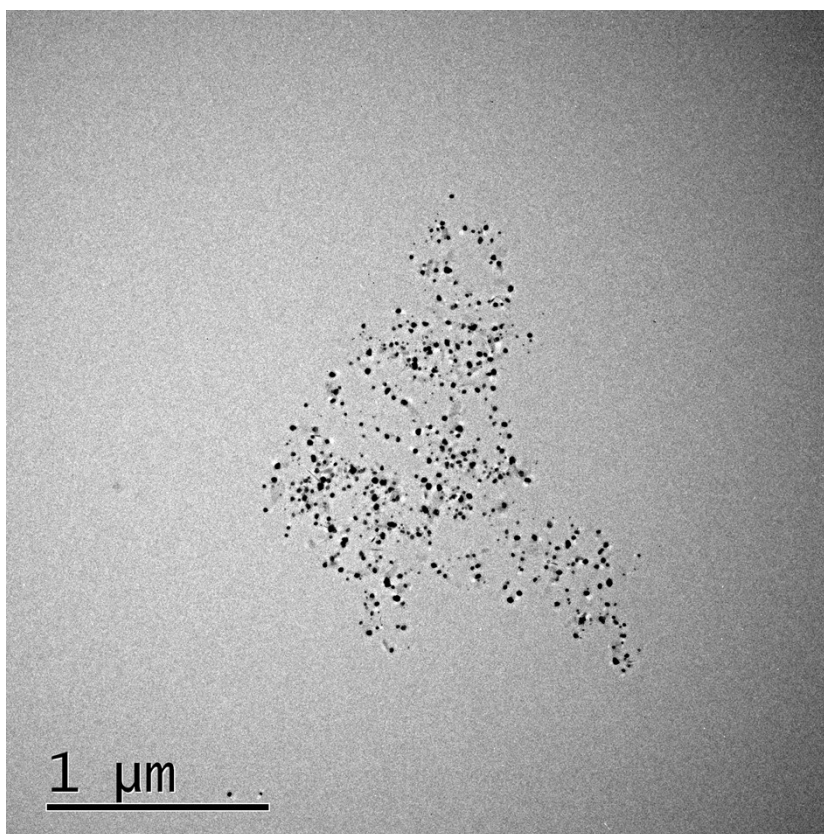

**Fig. S1.** The TEM image of as-prepared Au/MoS<sub>2</sub> nanostructures indicating the consistent distribution of Au and MoS<sub>2</sub> structures.

**Figure S2.**

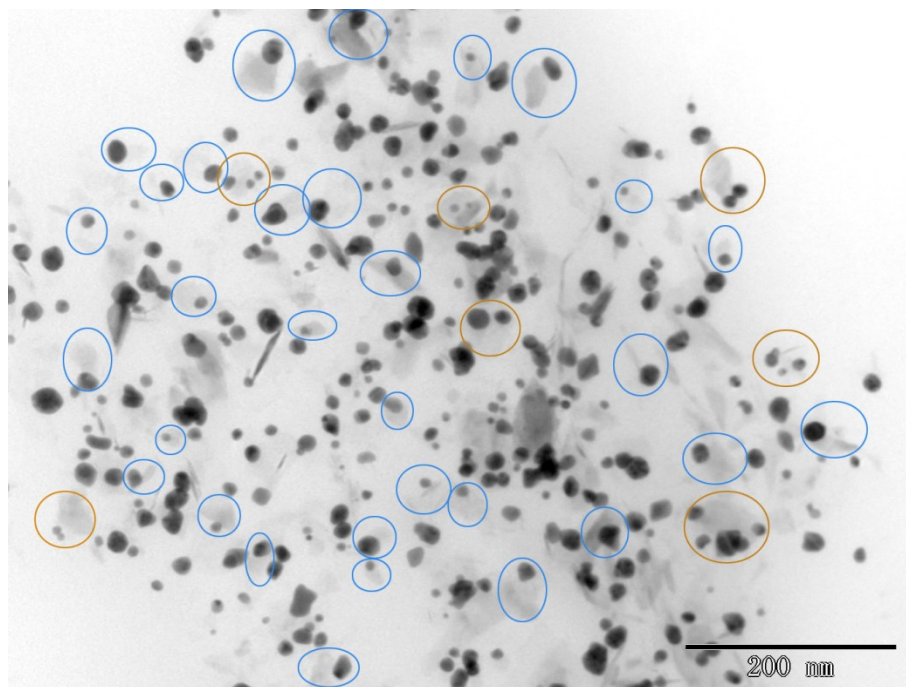

**Fig. 2.** The TEM image of as-prepared Au/MoS<sub>2</sub> nanostructures indicating the one-to-one (blue circle) and multiple-to-one (yellow circle) coupling formats.

**Figure S3**

.

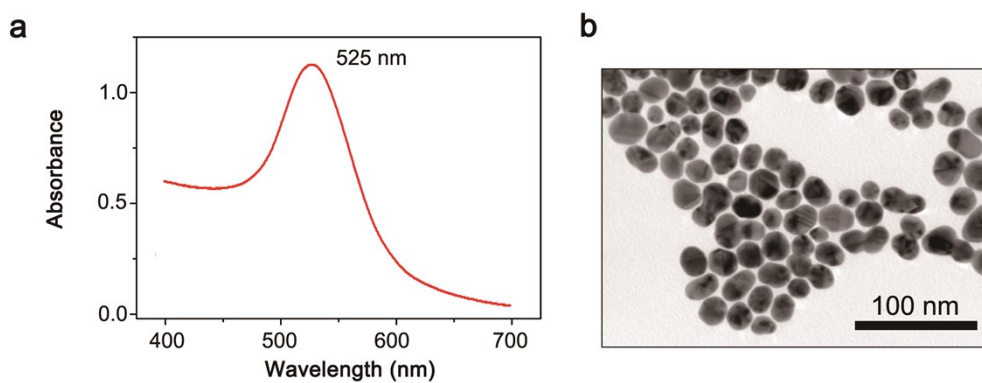

**Fig. S3.** The Absorption spectrum (a) and TEM image (b) of as-prepared AuNPs with the average size of 21 nm.
